# Supplementary material
Source: publisher site journal article supplement (https://www.dovepress.com/article/509270)
Supplement: Supplementary file 1 [file Stable.docx]

**Stable 1.** Particle size, PDI and zeta potential of cubic QUL

|  | **DLS (nm)** | **PDI** | **Zeta potential (mV)** |
| --- | --- | --- | --- |
| mean value | 157.08±1.215 | 0.204±0.012 | -38.12±0.071 |

Each repetition was performed as a separate, independent experiment, n=6.

**Stable 2**. Accuracy and precision for the analysis of QU

| **biological sample** | **concentration（μg/mL）** | **Intra-Day（n=6）** | | | **Inter-Day（n=6×3）** | | | |
| --- | --- | --- | --- | --- | --- | --- | --- | --- |
| Mean（*±s*） | RSD（%） | RE（%） | | Mean（*±s*） | RSD（%） | RE（%） |
| plasma | 0.01 | 0.0090±0.00095 | 10.54 | -10.02 | 0.010±0.0017 | | 16.43 | 2.01 |
| 0.02 | 0.09±0.0025 | 13.24 | -3.81 | 0.020±0.0021 | | 10.20 | 1.65 |
| 2 | 1.95±0.22 | 11.28 | -2.53 | 1.91±0.16 | | 8.17 | -4.29 |
| 4 | 4.15±0.41 | 9.94 | 3.74 | 4.12±0.45 | | 11.02 | 2.89 |

Each repetition was performed as a separate, independent experiment, n=6.

**Stable 3.** Extractive recovery of QU in rat plasma

| **biological sample** | **concentration**  **（μg /mL）** | **Recovery** | |
| --- | --- | --- | --- |
| **（*±s*%）** | **RSD（%）** |
| **plasma** | 0.02 | 99.55±2.71 | 2.72 |
| 2 | 94.87±6.59 | 6.94 |
| 4 | 96.15±3.00 | 3.12 |

Each repetition was performed as a separate, independent experiment, n=6.

**Stable 4.** Matrix effects of QU

| **biological sample** | **concentration**  **（μg /mL）** | **Matrix effects** | |
| --- | --- | --- | --- |
| **（*±s*%）** | **RSD（%）** |
| **plasma** | 0.02 | 93.76±9.45 | 10.07 |
| 2 | 95.53±3.11 | 3.26 |
| 4 | 94.06±7.22 | 7.68 |

Each repetition was performed as a separate, independent experiment, n=6.

**Stable 5.** Stability of QU (n=6)

| **biological sample** | **concentration**  **(μg /mL)** | **Room temperature stability** | | **Frozen (−80 °C) for 30 Days** | | **Freeze–Thaw**  **Cycles** | | **Auto-Sampler Stability** | |
| --- | --- | --- | --- | --- | --- | --- | --- | --- | --- |
| Mean（*±s*） | RE（%） | Mean（*±s*） | RE（%） | Mean（*±s*） | RE（%） | Mean（*±s*） | RE（%） |
| **plasma** | 0.02 | 0.022±0.0049 | 10.21 | 0.022±0.0039 | 8.57 | 0.019±0.0085 | -6.30 | 0.022±0.00037 | 9.59 |
| 2 | 2.01±0.15 | 0.58 | 1.85±0.28 | -7.60 | 1.74±0.22 | -1.38 | 1.87±0.26 | -6.28 |
| 4 | 4.29±0.22 | 7.18 | 3.93±0.42 | -1.82 | 3.67±0.26 | -8.35 | 4.36±0.072 | 8.89 |

Each repetition was performed as a separate, independent experiment, n=6.

**Stable 6.** Mouse mortality and percent reduction in mortality

| **Groups** | **Mortality rate** | **Decrease in mortality rate** | **Percentage reduction in mortality** |
| --- | --- | --- | --- |
| Nor | / | / | / |
| Mod | 50.00% | / | / |
| QUL-L | 37.5% | 12.5% | 25% |
| QUL-H | 25% | 25% | 50% |
| QU | 37.5% | 12.5% | 25% |
| NiF | 25% | 25% | 50% |
| Dex | 12.5% | 37.5% | 75% |

Each repetition was performed as a separate, independent experiment, n=6.
